# Supplementary material for: The syntheses and structures of Group 1 expanded dipyrrolides: the formation of a 12-rung amidolithium circular ladderElectronic supplementary information (ESI) available: full experimental details and crystallographic data. See http://www.rsc.org/suppdata/cc/b3/b303611a/
Source: Royal Society of Chemistry journal article supplement (doi:10.1039/b303611a), 2003-01-01
Supplement: b303611a.doc [file b303611a.doc]

# Supplementary Material

**General**

Unless otherwise stated, all reactions were carried out using standard Schlenk techniques under an atmosphere of nitrogen or in a nitrogen filled glove-box. Solvents were dried (Hexane, toluene, Et2O and THF were passed through activated alumina towers,1 dichloromethane was distilled from CaH2), and stored over 4 Å molecular sieves. Deuteriated benzene was vacuum distilled from K. Solvents used in the preparation of the ligands **1**, **L1**, **L2**, **L3** and **L4**, were used as purchased. The compounds Ph2C(C4H4N)2 and Me2C(C4H4N)2 were synthesised according to literature procedures;2 all other reagents were used as purchased. The 1H, 13C{1H} and 7Li{1H} NMR spectra were recorded on a Bruker DPX-300 spectrometer operating at 300.13, 75.47 and 116.64 MHz respectively; residual protio-solvent served as an internal reference for the former. Combustion analyses were carried out by Mr. Stephen Boyer at the London Metropolitan University.

1 A. B. Pangborn, M. A. Giardello, R. H. Grubbs, R. K. Rosen, and F. J. Timmers, *Organometallics*, 1998, **15**, 1518.

2 B. J. Littler, M. A. Miller, C.-H. Hung, R. W. Wagner, D. F. O'Shea, P. D. Boyle, and J. S. Lindsey, *J. Org. Chem.*, 1999, **64**, 1391; B. Turner, M. Botoshansky, and Y. Eichen, *Angew. Chem. Int. Ed.*, 1998, **37**, 2475; B. Turner, A. Shterenberg, M. Kapon, K. Suwinska, and Y. Eichen, *Chem. Commun.*, 2001, 13; D. M. M. Freckmann, T. Dubé, C. D. Bérubé, S. Gambarotta, and G. P. A. Yap, *Organometallics*, 2002, **21**, 1240.

**Experimental Details**

*Synthesis of 5, 5’–diformyl-2, 2’-dimethyldipyrromethane (****1a****)* – A stirred solution of dimethyldipyrromethane (1.00 g, 5.74 mmol) in DMF (5 mL) was degassed with a stream of argon for 5 min, after which the solution was cooled to 0 oC and POCl3 (1.76 g, 11.5 mmol) was added dropwise. The resultant dark red solution was stirred at room temperature for 1 h, then water (15 mL) was added and the mixture quenched with aqueous KOH (2.0 M) until strongly basic. The precipitated product was collected by suction filtration, washed with water (2 x 10 mL) and dried on the frit, yielding 1.17 g, 89 % of **1a** as an orange powder.

Analysis: Found: C, 67.70; H, 6.05; N, 11.99. C13H14N2O2 requires: C, 67.81; H, 6.13; N, 12.17 %

1H NMR (CDCl3, 298 K): δH 10.60 (br s, 2 H, pyrrole NH) , 9.29 (s, 2 H, CHO) , 6.87 (d, 2 H, J= 3.9 Hz, pyrrole H) , 6.22 (d, 2 H, *J* = 3.9 Hz, pyrrole H), 1.76 (s, 6 H, CH3). 13C{1H} NMR (CDCl3, 298 K): δc 179.3 (s, CHO), 148.1 (s, quaternary), 132.5 (s, quaternary), 127.6 (s, CH pyrrole), 108.3 (s, CH pyrrole), 36.3 (s, meso-quaternary), 28.2 (s, CH3).

*Synthesis of 5, 5’–diformyl-2, 2’-diphenyldipyrromethane (****1b****)* ‑ A stirred solution of diphenyldipyrromethane (23.30 g, 0.078 mol) in DMF (50 mL) was degassed with a stream of argon for 5 min, after which the solution was cooled to 0 oC and POCl3 (25.11 g, 0.164 mol) was added dropwise. The resultant dark red , viscous solution was stirred at room temperature for 1 h,, then poured into water (500 mL). The mixture was cooled to 0 ºC and aqueous NaOH (100 mL, 25 wt%) was added in portions. The resultant precipitate was isolated on a glass frit, washed with water (3 x 250 mL) and then slurried in ethanol (500 mL). Solid NaOH (10 g) was added, and the mixture heated to reflux temperature for 1 h, after which the red solution was allowed to cool, reduced to *ca.* 150 mL in volume under vacuum and was poured into water (750 mL). The resultant yellow precipitate was collected on a frit, washed with water (4 x 250 mL) and air dried. The solids were recrystallised from hot ethanol, yielding 20.7 g, 74 % of **1b** as yellow microcrystals.

Analysis: Found: C, 78.13; H, 5.30; N, 7.91. C23H18N2O2 requires: C, 77.95; H, 5.12; N, 7.90 %

1H NMR (CDCl3, 298 K): H 9.45 (s, 2 H, CHO), 8.95 (br.s, 2 H, NH pyrrole), 7.32 (m’s, 6 H, phenyl), 7.04 (m’s, 4 H, phenyl), 6.92 (m, 2 H, pyrrole H), 6.17 (m, 2 H, pyrrole H); 13C{1H} NMR (CDCl3, 298 K): δC 179.4 (s, CHO), 143.7 (s, quaternary C, pyrrole), 143.5 (s, quaternary C, pyrrole), 129.6 (s, *o/m*-C phenyl), 129.0 (s, *o/m*-C phenyl), 128.3 (s, *p*-C phenyl), 121.5 (s, CH pyrrole), 113.6 (s, CH pyrrole), *meso*-quaternary C not observed.

*Synthesis of the dipyrromethanediimine* ***L1*** – To a stirred solution of **1a** (2.00 g, 8.76 mmol) in methanol (50 mL) in a round bottom flask was added excess K2CO3. The slurry was chilled to 0C, a large excess of ButNH2 (*ca*. 2 mL) was added dropwise and the resulting orange mixture left to stir at room temperature for 16 hours. The solids were filtered and the solution evaporated to dryness under vacuum. The residues were extracted into CH2Cl2 (20 mL), filtered, evaporated to dryness and then sublimed at 120C, 10-2 mbar to yield **1a** as a colourless solid, 1.95 g, 65 %.

Analysis: Found: C, 73.83; H, 9.41; N, 16.31. C21H32N4 requires: C, 74.06; H, 9.49; N, 16.45 %

1H NMR (CDCl3, 298 K): H 8.25 (br.s, 2 H, NH pyrrole), 7.97 (s, 2 H, N=CH), 6.35 (d, 2 H, pyrrole H), 6.06 (d, 2 H, pyrrole H), 1.72 (s, 6 H, CH3), 1.24 (s 18 H, CMe3). 13C{1H} NMR (CDCl3, 298 K): C 147.4 (s, N=CH), 143.5 (s, Cq), 130.9 (s, Cq), 114.8 (s, CH), 105.9 (s, CH), 57.2 (s, Cq), 36.3 (s, Cq), 30.5 (s, CH3), 28.9 (s, CH3). MS (ES, +ve ion): *m/z* 341 (100 %, M+).

*Synthesis of the dipyrromethanediimine* ***L2*** – To a stirred solution of **1b** (2.50 g, 7.05 mmol) in methanol (40 mL) in a round bottom flask was added excess Na2CO3. The slurry was chilled to 0C, a large excess of ButNH2 (*ca*. 12.5 mL) was added and the resulting orange mixture left to stir at room temperature for 16 hours. The solids were filtered and the solution evaporated to dryness under vacuum. The residues were extracted into CH2Cl2 (20 mL), filtered, and evaporated to yield **1a** as beige solids, 3.13 g, 96 %.

Analysis: Found: C, 70.09; H, 7.97; N, 9.77. C31H36N4.2MeOH.2H2O requires: C, 70.18; H, 8.57; N, 9.92 %

1H NMR (CDCl3, 298 K): H 7.89 (s, 2 H, N=CH), 7.68 (br.s, 2 H, NH pyrrole), 7.20 (m’s, 6 H, phenyl), 6.92 (m’s, 4 H, phenyl), 6.30 (m, 2 H, pyrrole H), 5.73 (m, 2 H, pyrrole H), 1.17 (s, 18 H, CMe3); 13C{1H} NMR (CDCl3, 298 K): δC 147.3 (s, CH imine), 144.9 (s, quaternary C, pyrrole), 141.3 (s, quaternary C, pyrrole), 131.4 (s, quaternary C phenyl), 130.2 (s, *o/m*-C phenyl), 128.1 (s, *o/m*-C phenyl), 127.6 (s, *p*-C phenyl), 114.7 (s, CH pyrrole), 113.0 (s, CH pyrrole), 57.0 (s, quaternary CMe3), 30.2 (s, CH3, But), *meso*-quaternary C not observed.

*Synthesis of K2(THF)2[****L2****]*, **2** **‑** A solution of **L2** (0.50 g, 1.07 mmol) in THF (10 mL) was added dropwise by cannula to a stirred slurry of KH (0.50 g, 30 % wt in hydrocarbon oil, freed from the oil) in THF (10 mL) at room temperature, causing vigorous gas evolution. The mixture was stirred for 16 h, then filtered by cannula. The filtrate was reduced in volume, causing the deposition of **2** as colourless needles. The supernatant liquors were decanted and hexane (20 mL) was added, causing the formation of a colourless precipitate. The precipitate was washed with hexane (3 x 10 mL) and dried under vacuum. Yield (combined) 0.52 g, 75 %.

Found: C, 68.73; H, 6.42; N, 10.30. C31H34N4K2 requires: C, 68.85; H, 6.33; N, 10.36 %

1H NMR (C6D6, 298 K): H 8.21 (s, 2 H, N=CH), 7.86 (m, 4 H, *o*-H, phenyl), 7.20 (m’s, 6 H, phenyl), 6.74 (br.s, 2 H, pyrrole H), 6.41 (br.s, 2 H, pyrrole H), 3.65 (m, 8 H, THF), 1.50 (m, 8 H, THF), 1.12 (s, 18 H, CMe3).

*Synthesis of the dipyrromethanediamine* ***L3*** ‑A large excess of NaBH4 (*ca.*0.5 g)was added to a stirred solution of **L1** (0.10 g, 0.294 mmol) in ethanol (15 mL). The resultant slurry was heated to *ca*. 50 oC for 1 hour, after which the solids were filtered, the ethanolic filtrate evaporated dryness and the residues extracted into CH2Cl2 (2 x 5 mL). The extracts were evaporated to dryness and resulting residue was recrystallised from hot hexane (5 mL), yielding 0.040 g, 40 % of **L3** as colourless solids.

Analysis: Found: C, 73.33; H, 10.74; N, 16.34. C21H36N4 requires: C, 73.21; H, 10.53; N, 16.26 %

1H NMR (CDCl3, 298K): H 8.75 (br.s, 2 H, NH pyrrole), 5.91 (m, 4 H, pyrrole H), 3.66 (s, 4 H, N-CH2), 1.65 (s, 6 H, CH3), 1.17 (s, 18 H, CMe3). 13C{1H} NMR (CDCl3): C 139.1 (s, Cq), 129.9 (s, Cq), 105.4 (s, CH), 102.9 (s, CH), 50.6 (s, Cq), 39.9 (s, CH2), 35.3 (s, Cq), 29.2 (s, CH3), 28.8 (s, CH3).

*Synthesis of the dipyrromethanediamine* ***L4*** – A stirred solution of **L2** (2.60 g, 5.60 mmol) in methanol (50 mL) was treated with NaBH4 (0.70 g, 17.0 mmol) in portions, causing effervescence and warming. The resultant mixture was stirred at room temperature for 2 h, after which it was quenched by addition of aqueous HCl then made strongly basic by the addition of solid NaOH. The cooled mixture was extracted with CH2Cl2 (2 x 30 mL), and the extracts dried (MgSO4), filtered and evaporated to dryness under vacuum, yielding 1.81 g, 69 % of **L4**  as a brown oil. Due to difficulties in the purification of **L4**, the brown oil (*ca*. 95 % pure by NMR spectroscopy) was used as isolated for the lithiation reaction (see below).

1H NMR (CDCl3, 298 K): H 8.56 (br.s, 2 H, NH pyrrole), 7.27 (m’s, 6 H, phenyl), 7.10 (m’s, 4 H, phenyl), 5.93 (m, 2 H, pyrrole H), 5.78 (m, 2 H, pyrrole H), 3.71 (s, 4 H, N-CH2), 1.10 (s, 18 H, CMe3).

*Synthesis of Li4[****L4****]*, **3a**, **3b** ‑ A solution of BunLi in hexanes (10.9 mL, 2.5 M) was added dropwise to a stirred solution of **L4** (3.79 g, 8.09 mmol) in Et2O (25 mL) at –78 ºC. Upon warming, colourless solids precipitated from the orange solution. The mixture was stirred for 2 h at room temperature, after which the solids were collected on a glass sinter, washed with Et2O (2 x 10 mL) and dried under vacuum. Yield **3a**: 2.51 g, 63 %. The orange washings were evaporated to dryness under vacuum and redissolved in pentane (20 mL). Cooling the solution to –35 ºC resulted in the deposition of **3b** as colourless crystals that readily desolvated under vacuum. Yield **3b**: 0.46 g, 12 %.

Data for **3a**. 1H NMR (C6D6, 298 K): H 7.20 (m, 4 H, *o*-H, phenyl), 7.00 (m’s, 6 H, phenyl), 6.59 (d, 2 H, *J* 2.8 Hz, pyrrole H), 6.22 (d, 2 H, *J* 2.7 Hz, pyrrole H), 4.24 (AB d, 2 H, *J* 16.2 Hz, CH2-N), 4.17 (AB d, 2 H, *J* 16.2 Hz, CH2-N), 0.97 (s, 18 H, CMe3). 13C{1H} NMR (C6D6): C 150.1 (s, Cq), 145.8 (Cq), 144.4 (s, Cq), 130.8 (s, CH), 127.3 (s, CH), 126.2 (s, CH), 113.2 (s, CH pyrrole), 104.6 (s, CH pyrrole), 59.15 (s, Cq), 53.22 (Cq), 47.68 (s, CH2), 29.63 (s, CH3). 7Li{1H} NMR (C6D6): Li 0.10 (br.s), -7.86 (br.s). No satisfactory combustion analysis was obtained after repeated attempts.

Data for **3b**. Found: C, 75.50; H, 7.16; N, 11.31. C31H36N4Li4 requires: C, 75.61; H, 7.37; N, 11.38 % 1H NMR (C6D6, 298 K): H 7.45 (d, 4 H, *J* 7.2 Hz, *o*-H, phenyl), 7.03 (m’s, 6 H, phenyl), 6.37 (d, 2 H, *J* 2.4 Hz, pyrrole H), 6.06 (d, 2 H, *J* 2.4 Hz, pyrrole H), 4.08 (AB d, 2 H, *J* 14.5 Hz, CH2-N), 3.21 (AB d, 2 H, *J* 14.5 Hz, CH2-N), 0.84 (s, 18 H, CMe3). 13C{1H} NMR (C6D6): C 149.3 (s, Cq), 147.8 (Cq), 128.0 (s, CH), 126.0 (s, CH), 110.8 (s, CH pyrrole), 102.5 (s, CH pyrrole), 60.03 (s, Cq), 53.01 (Cq), 48.04 (s, CH2), 32.26 (s, CH3). 7Li{1H} NMR (C6D6): Li 0.08 (br.s), -7.65 (br.s).

Table 1. Crystal data and structure refinement for K2[**L2**] **2**.

Identification code dippyr

Empirical formula C39 H50 K2 N4 O2

Formula weight 685.03

Temperature 150(2) K

Wavelength 0.71073 Å

Crystal system Monoclinic

Space group P2(1)

Unit cell dimensions a = 13.773(3) Å = 90°.

b = 10.194(2) Å = 104.086(3)°.

c = 13.787(3) Å  = 90°.

Volume 1877.6(10) Å3

Z 2

Density (calculated) 1.212 Mg/m3

Absorption coefficient 0.290 mm-1

F(000) 732

Crystal size 1.01 x 0.08 x 0.06 mm3

Theta range for data collection 1.87 to 27.5°.

Index ranges -17<=h<=17, -13<=k<=13, -16<=l<=17

Reflections collected 16994

Independent reflections 7990 [R(int) = 0.083]

Completeness to theta = 27.50° 96.4 %

Absorption correction Semi-empirical from equivalents

Max. and min. transmission 1.00 and 0.741

Refinement method Full-matrix least-squares on F2

Data / restraints / parameters 7980 / 58 / 403

Goodness-of-fit on F2 1.048

Final R indices [I>2sigma(I)] R1 = 0.0690, wR2 = 0.1434

R indices (all data) R1 = 0.1148, wR2 = 0.1676

Absolute structure parameter -0.02(6)

Extinction coefficient 0.0028(12)

Largest diff. peak and hole 0.472 and -0.439 e.Å-3

Table 2. Atomic coordinates ( x 104) and equivalent isotropic displacement parameters (Å2x 103)

for DIPPYR. U(eq) is defined as one third of the trace of the orthogonalized Uij tensor.

________________________________________________________________________________

x y z U(eq)

________________________________________________________________________________

K(1) 7492(1) -1043(1) 7664(1) 37(1)

K(2) 5673(1) 930(1) 5257(1) 30(1)

O(2) 9388(3) -1877(4) 7549(3) 58(1)

N(1) 7906(3) 1707(4) 8088(3) 33(1)

N(2) 5954(3) 568(3) 7524(3) 26(1)

N(3) 5653(2) -1508(3) 6019(3) 23(1)

N(4) 7207(2) -1087(4) 5059(3) 30(1)

C(1) 7107(3) 2432(5) 7842(3) 30(1)

C(2) 6108(3) 1896(5) 7488(3) 26(1)

C(3) 5218(3) 2576(5) 7114(4) 29(1)

C(4) 4463(3) 1612(5) 6906(3) 28(1)

C(5) 4941(3) 397(5) 7158(3) 24(1)

C(6) 4494(3) -976(5) 7105(3) 23(1)

C(7) 5208(3) -1952(5) 6751(3) 24(1)

C(8) 5529(3) -3213(5) 7058(4) 28(1)

C(9) 6225(3) -3580(5) 6512(4) 29(1)

C(10) 6291(3) -2497(5) 5883(3) 26(1)

C(11) 7019(3) -2257(5) 5305(3) 25(1)

C(12) 4388(3) -1440(4) 8147(3) 24(1)

C(13) 4784(3) -720(5) 9016(4) 32(1)

C(14) 4683(4) -1157(6) 9944(4) 42(1)

C(15) 4177(4) -2322(5) 10024(4) 42(1)

C(16) 3780(4) -3021(6) 9175(4) 41(1)

C(17) 3878(4) -2585(5) 8239(4) 35(1)

C(18) 3452(3) -954(4) 6348(3) 24(1)

C(19) 2589(3) -620(5) 6665(4) 34(1)

C(20) 1659(3) -570(5) 5990(4) 39(1)

C(21) 1557(3) -858(5) 4985(4) 37(1)

C(22) 2414(3) -1171(5) 4667(4) 33(1)

C(23) 3335(3) -1202(5) 5343(3) 28(1)

C(24) 8907(3) 2296(5) 8515(4) 40(1)

C(25) 8866(4) 3718(6) 8896(5) 58(2)

C(26) 9416(4) 1430(6) 9384(4) 49(2)

C(27) 9486(4) 2224(7) 7692(4) 56(2)

C(28) 7975(3) -828(5) 4482(4) 33(1)

C(29) 7422(4) -117(7) 3542(5) 57(2)

C(30) 8734(4) 109(6) 5148(5) 53(2)

C(31) 8531(4) -2027(6) 4225(5) 47(2)

O(1) 7668(5) -2307(6) 9470(5) 57(2)

C(32) 7716(8) -1256(9) 10162(7) 63(3)

C(33) 7411(8) -1897(11) 11013(8) 71(3)

C(34) 7285(11) -3354(17) 10793(8) 101(5)

C(35) 7092(8) -3390(9) 9684(7) 65(3)

O(1') 7995(11) -2107(12) 9601(10) 41(4)

C(32') 7679(18) -1704(19) 10468(14) 60(6)

C(33') 7424(14) -2710(20) 11148(15) 43(4)

C(34') 7527(14) -3940(20) 10587(12) 46(5)

C(35') 7598(16) -3401(15) 9602(12) 51(5)

C(36) 9247(9) -3174(9) 7144(12) 62(4)

C(37) 10247(7) -3739(13) 7265(12) 76(5)

C(36') 9275(7) -3245(7) 7629(11) 48(3)

C(37') 10253(5) -3917(8) 7680(8) 24(2)

C(38) 10990(4) -2804(5) 7854(5) 59(2)

C(39) 10403(4) -1641(6) 8041(5) 52(2)

________________________________________________________________________________

Table 3. Bond lengths [Å] and angles [°] for DIPPYR.

____________________________________

K(1)-N(2) 2.650(4)

K(1)-O(1) 2.761(7)

K(1)-O(2) 2.787(4)

K(1)-O(1') 2.809(14)

K(1)-N(1) 2.892(4)

K(1)-N(3) 2.997(4)

K(1)-C(10) 2.998(5)

K(1)-C(7) 3.227(4)

K(1)-C(9) 3.302(5)

K(1)-C(11) 3.392(5)

K(1)-C(8) 3.435(5)

K(1)-C(2) 3.527(5)

K(2)-N(3) 2.701(4)

K(2)-N(4) 3.007(4)

K(2)-N(2) 3.077(4)

K(2)-C(5) 3.078(4)

K(2)-C(2) 3.145(5)

K(2)-C(9)#1 3.151(5)

K(2)-C(4) 3.205(5)

K(2)-C(10)#1 3.207(4)

K(2)-C(3) 3.248(5)

K(2)-C(8)#1 3.334(5)

K(2)-C(23)#1 3.412(5)

K(2)-N(3)#1 3.419(4)

O(2)-C(36') 1.410(7)

O(2)-C(39) 1.418(6)

O(2)-C(36) 1.430(8)

N(1)-C(1) 1.300(6)

N(1)-C(24) 1.488(6)

N(2)-C(2) 1.373(6)

N(2)-C(5) 1.375(5)

N(3)-C(7) 1.378(5)

N(3)-C(10) 1.380(5)

N(3)-K(2)#2 3.419(4)

N(4)-C(11) 1.284(6)

N(4)-C(28) 1.493(5)

C(1)-C(2) 1.450(6)

C(2)-C(3) 1.393(6)

C(3)-C(4) 1.408(6)

C(4)-C(5) 1.406(6)

C(5)-C(6) 1.523(6)

C(6)-C(12) 1.554(6)

C(6)-C(18) 1.556(6)

C(6)-C(7) 1.558(6)

C(7)-C(8) 1.392(7)

C(7)-K(2)#2 3.487(5)

C(8)-C(9) 1.406(6)

C(9)-C(10) 1.420(6)

C(10)-C(11) 1.445(6)

C(10)-K(2)#2 3.207(4)

C(12)-C(17) 1.384(6)

C(12)-C(13) 1.398(7)

C(13)-C(14) 1.394(7)

C(14)-C(15) 1.394(8)

C(15)-C(16) 1.366(8)

C(16)-C(17) 1.402(7)

C(18)-C(23) 1.380(6)

C(18)-C(19) 1.404(6)

C(19)-C(20) 1.389(7)

C(20)-C(21) 1.389(7)

C(21)-C(22) 1.392(6)

C(22)-C(23) 1.379(6)

C(23)-K(2)#2 3.412(5)

C(24)-C(26) 1.516(8)

C(24)-C(27) 1.538(8)

C(24)-C(25) 1.548(8)

C(28)-C(29) 1.518(8)

C(28)-C(31) 1.530(7)

C(28)-C(30) 1.543(7)

O(1)-C(32) 1.425(7)

O(1)-C(35) 1.432(7)

C(32)-C(33) 1.489(8)

C(33)-C(34) 1.518(19)

C(34)-C(35) 1.487(8)

O(1')-C(32') 1.428(8)

O(1')-C(35') 1.429(8)

C(32')-C(33') 1.491(9)

C(33')-C(34') 1.49(3)

C(34')-C(35') 1.489(8)

C(36)-C(37) 1.465(8)

C(37)-C(38) 1.487(8)

C(36')-C(37') 1.498(7)

C(37')-C(38) 1.502(7)

C(38)-C(39) 1.492(6)

N(2)-K(1)-O(1) 104.36(17)

N(2)-K(1)-O(2) 158.16(13)

O(1)-K(1)-O(2) 91.79(17)

N(2)-K(1)-O(1') 108.4(3)

O(1)-K(1)-O(1') 10.0(3)

O(2)-K(1)-O(1') 85.3(3)

N(2)-K(1)-N(1) 61.88(11)

O(1)-K(1)-N(1) 107.46(16)

O(2)-K(1)-N(1) 99.55(12)

O(1')-K(1)-N(1) 101.0(3)

N(2)-K(1)-N(3) 61.94(10)

O(1)-K(1)-N(3) 118.76(17)

O(2)-K(1)-N(3) 122.65(12)

O(1')-K(1)-N(3) 128.7(3)

N(1)-K(1)-N(3) 113.26(11)

N(2)-K(1)-C(10) 88.56(12)

O(1)-K(1)-C(10) 114.70(17)

O(2)-K(1)-C(10) 98.06(12)

O(1')-K(1)-C(10) 123.2(3)

N(1)-K(1)-C(10) 133.42(13)

N(3)-K(1)-C(10) 26.63(10)

N(2)-K(1)-C(7) 57.54(11)

O(1)-K(1)-C(7) 94.66(17)

O(2)-K(1)-C(7) 136.73(13)

O(1')-K(1)-C(7) 104.6(3)

N(1)-K(1)-C(7) 118.86(12)

N(3)-K(1)-C(7) 25.25(10)

C(10)-K(1)-C(7) 41.18(11)

N(2)-K(1)-C(9) 97.52(11)

O(1)-K(1)-C(9) 89.35(17)

O(2)-K(1)-C(9) 97.26(12)

O(1')-K(1)-C(9) 97.7(3)

N(1)-K(1)-C(9) 155.71(12)

N(3)-K(1)-C(9) 42.46(10)

C(10)-K(1)-C(9) 25.46(12)

C(7)-K(1)-C(9) 40.25(11)

N(2)-K(1)-C(11) 101.11(11)

O(1)-K(1)-C(11) 130.44(16)

O(2)-K(1)-C(11) 78.35(11)

O(1')-K(1)-C(11) 135.8(3)

N(1)-K(1)-C(11) 122.02(12)

N(3)-K(1)-C(11) 44.53(9)

C(10)-K(1)-C(11) 25.18(10)

C(7)-K(1)-C(11) 65.14(11)

C(9)-K(1)-C(11) 45.35(11)

N(2)-K(1)-C(8) 79.26(11)

O(1)-K(1)-C(8) 79.04(17)

O(2)-K(1)-C(8) 118.84(12)

O(1')-K(1)-C(8) 88.8(3)

N(1)-K(1)-C(8) 141.10(11)

N(3)-K(1)-C(8) 40.93(11)

C(10)-K(1)-C(8) 40.34(12)

C(7)-K(1)-C(8) 23.87(11)

C(9)-K(1)-C(8) 24.00(11)

C(11)-K(1)-C(8) 64.90(11)

N(2)-K(1)-C(2) 19.89(11)

O(1)-K(1)-C(2) 112.69(16)

O(2)-K(1)-C(2) 138.87(12)

O(1')-K(1)-C(2) 113.4(3)

N(1)-K(1)-C(2) 42.89(10)

N(3)-K(1)-C(2) 74.88(10)

C(10)-K(1)-C(2) 100.51(12)

C(7)-K(1)-C(2) 75.98(11)

C(9)-K(1)-C(2) 114.75(11)

C(11)-K(1)-C(2) 105.63(11)

C(8)-K(1)-C(2) 98.64(11)

N(3)-K(2)-N(4) 58.68(10)

N(3)-K(2)-N(2) 60.32(10)

N(4)-K(2)-N(2) 95.32(10)

N(3)-K(2)-C(5) 57.96(11)

N(4)-K(2)-C(5) 109.85(12)

N(2)-K(2)-C(5) 25.81(10)

N(3)-K(2)-C(2) 85.68(12)

N(4)-K(2)-C(2) 109.38(12)

N(2)-K(2)-C(2) 25.46(11)

C(5)-K(2)-C(2) 41.07(12)

N(3)-K(2)-C(9)#1 111.22(12)

N(4)-K(2)-C(9)#1 120.48(12)

N(2)-K(2)-C(9)#1 132.88(11)

C(5)-K(2)-C(9)#1 107.74(12)

C(2)-K(2)-C(9)#1 129.18(12)

N(3)-K(2)-C(4) 82.37(11)

N(4)-K(2)-C(4) 135.28(12)

N(2)-K(2)-C(4) 42.61(11)

C(5)-K(2)-C(4) 25.76(12)

C(2)-K(2)-C(4) 41.11(11)

C(9)#1-K(2)-C(4) 92.15(12)

N(3)-K(2)-C(10)#1 124.28(11)

N(4)-K(2)-C(10)#1 145.55(12)

N(2)-K(2)-C(10)#1 116.10(11)

C(5)-K(2)-C(10)#1 95.34(11)

C(2)-K(2)-C(10)#1 105.05(12)

C(9)#1-K(2)-C(10)#1 25.79(12)

C(4)-K(2)-C(10)#1 73.54(12)

N(3)-K(2)-C(3) 98.40(12)

N(4)-K(2)-C(3) 134.37(11)

N(2)-K(2)-C(3) 42.40(11)

C(5)-K(2)-C(3) 41.71(12)

C(2)-K(2)-C(3) 25.11(11)

C(9)#1-K(2)-C(3) 104.19(12)

C(4)-K(2)-C(3) 25.20(11)

C(10)#1-K(2)-C(3) 80.00(12)

N(3)-K(2)-C(8)#1 124.32(12)

N(4)-K(2)-C(8)#1 106.76(11)

N(2)-K(2)-C(8)#1 156.08(10)

C(5)-K(2)-C(8)#1 132.23(11)

C(2)-K(2)-C(8)#1 141.83(12)

C(9)#1-K(2)-C(8)#1 24.84(11)

C(4)-K(2)-C(8)#1 113.53(12)

C(10)#1-K(2)-C(8)#1 40.29(11)

C(3)-K(2)-C(8)#1 118.25(12)

N(3)-K(2)-C(23)#1 157.66(11)

N(4)-K(2)-C(23)#1 103.43(11)

N(2)-K(2)-C(23)#1 112.95(11)

C(5)-K(2)-C(23)#1 126.23(12)

C(2)-K(2)-C(23)#1 88.65(12)

C(9)#1-K(2)-C(23)#1 89.01(12)

C(4)-K(2)-C(23)#1 107.09(12)

C(10)#1-K(2)-C(23)#1 78.06(11)

C(3)-K(2)-C(23)#1 85.06(12)

C(8)#1-K(2)-C(23)#1 71.27(11)

N(3)-K(2)-N(3)#1 148.04(6)

N(4)-K(2)-N(3)#1 140.79(10)

N(2)-K(2)-N(3)#1 122.25(9)

C(5)-K(2)-N(3)#1 109.16(10)

C(2)-K(2)-N(3)#1 102.40(11)

C(9)#1-K(2)-N(3)#1 40.70(10)

C(4)-K(2)-N(3)#1 83.93(10)

C(10)#1-K(2)-N(3)#1 23.77(9)

C(3)-K(2)-N(3)#1 80.18(10)

C(8)#1-K(2)-N(3)#1 39.54(10)

C(23)#1-K(2)-N(3)#1 54.29(10)

C(36')-O(2)-C(39) 104.2(6)

C(36')-O(2)-C(36) 27.0(7)

C(39)-O(2)-C(36) 111.6(6)

C(36')-O(2)-K(1) 100.0(4)

C(39)-O(2)-K(1) 138.5(3)

C(36)-O(2)-K(1) 105.3(5)

C(1)-N(1)-C(24) 121.2(4)

C(1)-N(1)-K(1) 112.7(3)

C(24)-N(1)-K(1) 126.1(3)

C(2)-N(2)-C(5) 105.3(4)

C(2)-N(2)-K(1) 119.1(3)

C(5)-N(2)-K(1) 132.1(3)

C(2)-N(2)-K(2) 80.0(3)

C(5)-N(2)-K(2) 77.1(2)

K(1)-N(2)-K(2) 92.82(11)

C(7)-N(3)-C(10) 105.7(4)

C(7)-N(3)-K(2) 129.5(3)

C(10)-N(3)-K(2) 123.5(3)

C(7)-N(3)-K(1) 86.7(2)

C(10)-N(3)-K(1) 76.7(2)

K(2)-N(3)-K(1) 93.58(11)

C(7)-N(3)-K(2)#2 81.3(2)

C(10)-N(3)-K(2)#2 69.5(2)

K(2)-N(3)-K(2)#2 123.87(13)

K(1)-N(3)-K(2)#2 139.22(12)

C(11)-N(4)-C(28) 121.3(4)

C(11)-N(4)-K(2) 114.9(3)

C(28)-N(4)-K(2) 122.1(3)

N(1)-C(1)-C(2) 123.1(5)

N(2)-C(2)-C(3) 112.0(4)

N(2)-C(2)-C(1) 120.1(4)

C(3)-C(2)-C(1) 127.9(4)

N(2)-C(2)-K(2) 74.5(3)

C(3)-C(2)-K(2) 81.6(3)

C(1)-C(2)-K(2) 112.7(3)

N(2)-C(2)-K(1) 41.0(2)

C(3)-C(2)-K(1) 149.3(3)

C(1)-C(2)-K(1) 81.1(3)

K(2)-C(2)-K(1) 76.87(10)

C(2)-C(3)-C(4) 105.5(4)

C(2)-C(3)-K(2) 73.3(3)

C(4)-C(3)-K(2) 75.7(3)

C(5)-C(4)-C(3) 106.6(4)

C(5)-C(4)-K(2) 72.0(2)

C(3)-C(4)-K(2) 79.1(3)

N(2)-C(5)-C(4) 110.5(4)

N(2)-C(5)-C(6) 119.8(4)

C(4)-C(5)-C(6) 129.7(4)

N(2)-C(5)-K(2) 77.1(2)

C(4)-C(5)-K(2) 82.2(3)

C(6)-C(5)-K(2) 109.5(3)

C(5)-C(6)-C(12) 111.3(4)

C(5)-C(6)-C(18) 108.4(4)

C(12)-C(6)-C(18) 110.2(3)

C(5)-C(6)-C(7) 108.9(3)

C(12)-C(6)-C(7) 107.7(3)

C(18)-C(6)-C(7) 110.4(4)

N(3)-C(7)-C(8) 111.2(4)

N(3)-C(7)-C(6) 116.5(4)

C(8)-C(7)-C(6) 132.3(4)

N(3)-C(7)-K(1) 68.0(2)

C(8)-C(7)-K(1) 86.5(3)

C(6)-C(7)-K(1) 108.9(3)

N(3)-C(7)-K(2)#2 75.7(2)

C(8)-C(7)-K(2)#2 72.1(3)

C(6)-C(7)-K(2)#2 121.3(2)

K(1)-C(7)-K(2)#2 127.25(13)

C(7)-C(8)-C(9) 106.8(4)

C(7)-C(8)-K(1) 69.7(2)

C(9)-C(8)-K(1) 72.7(3)

C(8)-C(9)-C(10) 105.9(4)

C(8)-C(9)-K(1) 83.3(3)

C(10)-C(9)-K(1) 65.2(2)

N(3)-C(10)-C(9) 110.3(4)

N(3)-C(10)-C(11) 120.1(4)

C(9)-C(10)-C(11) 128.6(4)

N(3)-C(10)-K(1) 76.7(2)

C(9)-C(10)-K(1) 89.3(3)

C(11)-C(10)-K(1) 92.8(3)

N(3)-C(10)-K(2)#2 86.7(2)

C(9)-C(10)-K(2)#2 74.9(2)

C(11)-C(10)-K(2)#2 115.5(3)

K(1)-C(10)-K(2)#2 151.60(15)

N(4)-C(11)-C(10) 121.0(4)

N(4)-C(11)-K(1) 84.9(3)

C(10)-C(11)-K(1) 62.0(2)

C(17)-C(12)-C(13) 117.7(4)

C(17)-C(12)-C(6) 120.4(4)

C(13)-C(12)-C(6) 121.9(4)

C(14)-C(13)-C(12) 120.9(5)

C(13)-C(14)-C(15) 120.6(5)

C(16)-C(15)-C(14) 118.7(5)

C(15)-C(16)-C(17) 121.0(5)

C(12)-C(17)-C(16) 121.1(5)

C(23)-C(18)-C(19) 117.2(4)

C(23)-C(18)-C(6) 122.3(4)

C(19)-C(18)-C(6) 120.5(4)

C(20)-C(19)-C(18) 120.8(5)

C(19)-C(20)-C(21) 120.9(4)

C(20)-C(21)-C(22) 118.4(4)

C(23)-C(22)-C(21) 120.2(5)

C(22)-C(23)-C(18) 122.5(4)

C(22)-C(23)-K(2)#2 102.3(3)

C(18)-C(23)-K(2)#2 116.4(3)

N(1)-C(24)-C(26) 106.5(4)

N(1)-C(24)-C(27) 106.6(4)

C(26)-C(24)-C(27) 109.4(5)

N(1)-C(24)-C(25) 113.9(4)

C(26)-C(24)-C(25) 109.0(5)

C(27)-C(24)-C(25) 111.4(5)

N(4)-C(28)-C(29) 105.4(4)

N(4)-C(28)-C(31) 116.2(4)

C(29)-C(28)-C(31) 111.0(5)

N(4)-C(28)-C(30) 105.0(4)

C(29)-C(28)-C(30) 109.8(5)

C(31)-C(28)-C(30) 109.1(4)

C(32)-O(1)-C(35) 112.3(7)

C(32)-O(1)-K(1) 103.5(5)

C(35)-O(1)-K(1) 127.9(6)

O(1)-C(32)-C(33) 102.8(8)

C(32)-C(33)-C(34) 108.2(9)

C(35)-C(34)-C(33) 102.3(10)

O(1)-C(35)-C(34) 102.9(9)

C(32')-O(1')-C(35') 94.1(14)

C(32')-O(1')-K(1) 129.0(12)

C(35')-O(1')-K(1) 110.5(10)

O(1')-C(32')-C(33') 119.6(16)

C(32')-C(33')-C(34') 100.6(15)

C(35')-C(34')-C(33') 101.7(16)

O(1')-C(35')-C(34') 116.6(15)

O(2)-C(36)-C(37) 106.5(9)

C(36)-C(37)-C(38) 108.3(9)

O(2)-C(36')-C(37') 109.9(7)

C(36')-C(37')-C(38) 103.2(6)

C(37)-C(38)-C(39) 105.9(6)

C(37)-C(38)-C(37') 23.1(7)

C(39)-C(38)-C(37') 104.7(5)

O(2)-C(39)-C(38) 107.2(4)

Symmetry transformations used to generate equivalent atoms:

#1 -x+1,y+1/2,-z+1 #2 -x+1,y-1/2,-z+1

Table 4. Anisotropic displacement parameters (Å2x 103) for DIPPYR. The anisotropic

displacement factor exponent takes the form: -22[ h2 a*2U11 + ... + 2 h k a* b* U12 ]

______________________________________________________________________________

U11 U22 U33 U23 U13 U12

______________________________________________________________________________

K(1) 25(1) 35(1) 48(1) -4(1) 2(1) 2(1)

K(2) 28(1) 31(1) 33(1) 5(1) 12(1) 3(1)

N(1) 24(2) 36(2) 38(3) -4(2) 4(2) -8(2)

N(2) 23(2) 25(2) 28(2) -2(2) 5(2) -2(2)

N(3) 20(2) 26(2) 27(2) 3(2) 12(2) 0(2)

N(4) 25(2) 32(2) 36(2) 1(2) 13(2) 0(2)

C(1) 34(2) 32(3) 26(3) 0(2) 10(2) -11(2)

C(2) 28(2) 30(3) 22(3) -3(2) 12(2) -6(2)

C(3) 33(2) 25(2) 30(3) 5(2) 9(2) 3(2)

C(4) 25(2) 30(3) 30(3) 2(2) 9(2) -1(2)

C(5) 19(2) 30(2) 25(3) 1(2) 8(2) -1(2)

C(6) 20(2) 24(2) 25(2) 3(2) 6(2) 3(2)

C(7) 16(2) 33(3) 22(3) -2(2) 3(2) -7(2)

C(8) 30(2) 27(3) 30(3) 1(2) 12(2) -2(2)

C(9) 27(2) 23(2) 36(3) -2(2) 7(2) 2(2)

C(10) 19(2) 30(3) 28(3) -2(2) 7(2) 1(2)

C(11) 22(2) 27(3) 26(3) -2(2) 6(2) 4(2)

C(12) 17(2) 30(3) 27(3) 0(2) 8(2) 4(2)

C(13) 34(2) 39(3) 26(3) -2(2) 12(2) -5(2)

C(14) 44(3) 50(3) 30(3) 8(3) 9(2) 8(3)

C(15) 58(3) 45(3) 28(3) 13(3) 21(3) 11(3)

C(16) 41(3) 39(3) 49(4) 8(3) 23(3) -5(2)

C(17) 36(3) 33(3) 38(3) 1(2) 12(2) -5(2)

C(18) 24(2) 23(2) 25(3) -2(2) 6(2) -5(2)

C(19) 28(2) 41(3) 35(3) -4(2) 13(2) -3(2)

C(20) 21(2) 55(4) 42(4) -3(3) 9(2) -2(2)

C(21) 20(2) 45(3) 42(3) 0(3) 0(2) -2(2)

C(22) 33(2) 34(3) 31(3) 0(2) 9(2) -3(2)

C(23) 29(2) 28(3) 29(3) 0(2) 9(2) 0(2)

C(24) 29(2) 42(3) 45(4) 2(3) -2(2) -13(2)

C(25) 42(3) 45(4) 75(5) -7(3) -11(3) -11(3)

C(26) 44(3) 62(4) 33(3) 8(3) -6(3) -11(3)

C(27) 22(2) 93(5) 48(4) 12(3) 1(2) -20(3)

C(28) 25(2) 38(3) 39(3) 1(2) 15(2) 1(2)

C(29) 43(3) 76(5) 58(4) 33(4) 25(3) 7(3)

C(30) 38(3) 49(4) 80(5) -15(3) 29(3) -15(3)

C(31) 34(3) 54(4) 61(4) -2(3) 30(3) -2(2)

Table 5. Hydrogen coordinates ( x 104) and isotropic displacement parameters (Å2x 10 3)

for DIPPYR.

________________________________________________________________________________

x y z U(eq)

________________________________________________________________________________

H(1A) 7181 3358 7896 36

H(3A) 5118 3545 7141 35

H(4A) 3727 1777 6773 33

H(8A) 5273 -3778 7534 34

H(9A) 6494 -4482 6461 35

H(11A) 7431 -3003 5154 30

H(13A) 5127 79 8974 38

H(14A) 4960 -658 10527 50

H(15A) 4111 -2624 10656 51

H(16A) 3431 -3814 9219 49

H(17A) 3590 -3084 7659 42

H(19A) 2641 -427 7350 41

H(20A) 1085 -335 6218 47

H(21A) 919 -841 4527 44

H(22A) 2364 -1365 3982 39

H(23A) 3911 -1402 5107 34

H(25A) 8496 3732 9420 87

H(25B) 8528 4282 8341 87

H(25C) 9548 4040 9170 87

H(26A) 9051 1479 9910 74

H(26B) 10106 1730 9650 74

H(26C) 9422 521 9154 74

H(27A) 9163 2793 7134 84

H(27B) 9486 1317 7455 84

H(27C) 10177 2514 7963 84

H(29A) 6940 -716 3122 85

H(29B) 7903 184 3171 85

H(29C) 7065 639 3726 85

H(30A) 8383 884 5310 79

H(30B) 9234 381 4790 79

H(30C) 9068 -343 5766 79

H(31A) 8053 -2624 3798 70

H(31B) 8866 -2482 4842 70

H(31C) 9031 -1745 3869 70

H(32A) 7248 -542 9871 76

H(32C) 8402 -896 10375 76

H(33A) 6773 -1517 11092 86

H(33B) 7929 -1753 11641 86

H(34A) 7900 -3846 11112 121

H(34B) 6713 -3718 11023 121

H(35A) 7323 -4228 9453 78

H(35B) 6371 -3273 9366 78

H(32B) 7084 -1137 10240 72

H(32D) 8216 -1146 10873 72

H(33C) 6733 -2600 11227 51

H(33D) 7900 -2698 11815 51

H(34C) 8138 -4429 10915 55

H(34D) 6935 -4512 10519 55

H(35C) 8019 -4003 9316 61

H(35D) 6919 -3410 9148 61

H(36A) 8891 -3145 6428 74

H(36B) 8848 -3706 7507 74

H(37A) 10386 -3890 6602 91

H(37B) 10290 -4590 7618 91

H(36C) 8765 -3570 7043 58

H(36D) 9043 -3447 8238 58

H(37C) 10246 -4378 7047 29

H(37D) 10410 -4554 8238 29

H(38A) 11484 -2545 7474 71

H(38B) 11352 -3206 8494 71

H(39A) 10473 -1524 8768 62

H(39B) 10647 -837 7774 62

________________________________________________________________________________

Table 1. Crystal data and structure refinement for {Li4[**L4**]}3 **3b**

Identification code feb2401

Empirical formula C118 H168 Li12 N12

Formula weight 1837.92

Temperature 173(2) K

Wavelength 0.71073 Å

Crystal system Rhombohedral (on hexagonal axes)

Space group Rc (No.167)

Unit cell dimensions a = 22.3735(5) Å = 90°.

b = 22.3735(5) Å = 90°.

c = 38.3087(15) Å  = 120°.

Volume 16607.2(8) Å3

Z 6

Density (calculated) 1.10 Mg/m3

Absorption coefficient 0.06 mm-1

F(000) 5976

Crystal size 0.4 x 0.4 x 0.4 mm3

Theta range for data collection 3.83 to 22.98°.

Index ranges -23<=h<=24, -23<=k<=24, -37<=l<=42

Reflections collected 20451

Independent reflections 2545 [R(int) = 0.067]

Reflections with I>2sigma(I) 2074

Completeness to theta = 22.98° 98.9 %

Refinement method Full-matrix least-squares on F2

Data / restraints / parameters 2545 / 0 / 203

Goodness-of-fit on F2 1.041

Final R indices [I>2sigma(I)] R1 = 0.055, wR2 = 0.134

R indices (all data) R1 = 0.070, wR2 = 0.145

Largest diff. peak and hole 0.51 and -0.38 e.Å-3

The trimeric Li complex lies on site symmetry 32 and is well defined. There are two areas of very diffuse residual density , one on a 2-fold axis and the other on a three fold axis, which were presumed to be solvate molecules (pentane or Et2O). These were poorly defined and were approximated with isotropic C atoms and with H atoms omitted.

Data collection KappaCCD , Program package WinGX , Abs correction not applied ,

Refinement using SHELXL-97 , Drawing using ORTEP-3 for Windows (20% ellipsoids)

Table 2. Atomic coordinates ( x 104) and equivalent isotropic displacement parameters (Å2x 103)

for feb2401. U(eq) is defined as one third of the trace of the orthogonalized Uij tensor.

_____________________________________________________________________________

x y z U(eq)

______________________________________________________________________________

Li(1) 8168(2) 5423(2) 894(1) 34(1)

Li(2) 6118(2) 4389(2) 1168(1) 35(1)

N(1) 7240(1) 5195(1) 1064(1) 29(1)

N(2) 8368(1) 4836(1) 1243(1) 30(1)

C(1) 7648(1) 4480(1) 1372(1) 33(1)

C(2) 7267(1) 4880(1) 1370(1) 29(1)

C(3) 6902(1) 4988(1) 1630(1) 34(1)

C(4) 6635(1) 5387(1) 1481(1) 33(1)

C(5) 6849(1) 5505(1) 1137(1) 29(1)

C(6) 6667 5830(1) 833 30(1)

C(7) 7285(1) 6541(1) 737(1) 33(1)

C(8) 7219(1) 6942(1) 478(1) 49(1)

C(9) 7769(2) 7575(1) 383(1) 62(1)

C(10) 8399(2) 7828(1) 547(1) 56(1)

C(11) 8471(1) 7451(1) 809(1) 46(1)

C(12) 7919(1) 6813(1) 904(1) 36(1)

C(13) 8877(1) 5347(1) 1491(1) 33(1)

C(14) 8849(1) 6020(1) 1503(1) 43(1)

C(15) 9586(1) 5517(1) 1353(1) 51(1)

C(16) 8802(2) 5070(1) 1865(1) 48(1)

C(17) 2228(8) 3333 833 274(7)

C(18) 2122(6) 2634(6) 785(3) 126(4)

C(18A) 1954(14) 2829(14) 592(7) 261(10)

C(19) 1482(5) 2076(5) 591(2) 212(3)

C(20) 10000 10000 1016(8) 319(11)

C(21) 9500(20) 9850(30) 718(12) 320(20)

C(22) 10000 10000 352(5) 193(5)

C(23) 10370(30) 10521(17) 91(10) 279(19)

______________________________________________________________________________

Table 3. Bond lengths [Å] and angles [°] for feb2401.

____________________________________

Li(1)-N(1) 1.985(4)

Li(1)-N(2)” 2.002(4)

Li(1)-N(2) 2.074(4)

Li(2)-M(1) 1.971(4)

Li(2)-N(2)’“ 2.056(4)

Li(2)-C(5) 2.200(4)

Li(2)-N(1)’ 2.234(4)

Li(2)-C(4) 2.274(4)

Li(2)-N(1) 2.277(4)

Li(2)-C(2) 2.364(4)

Li(2)-C(3) 2.378(4)

N(1)-C(2) 1.385(3)

N(1)-C(5) 1.389(3)

N(2)-C(1) 1.479(3)

N(2)-C(13) 1.484(3)

C(1)-C(2) 1.514(3)

C(2)-C(3) 1.383(3)

C(3)-C(4) 1.419(3)

C(4)-C(5) 1.380(3)

C(5)-C(6) 1.532(3)

C(6)-C(5)’ 1.532(3)

C(6)-C(7) 1.543(3)

C(6)-C(7)’ 1.543(3)

C(7)-C(12) 1.389(3)

C(7)-C(8) 1.392(3)

C(8)-C(9) 1.382(4)

C(9)-C(10) 1.377(4)

C(10)-C(11) 1.372(4)

C(11)-C(12) 1.391(3)

C(13)-C(15) 1.529(3)

C(13)-C(16) 1.535(3)

C(13)-C(14) 1.538(3)

N(1)-Li(1)-N(2)” 114.39(19)

N(1)-Li(1)-N(2) 98.87(17)

N(2)”-Li(1)-N(2) 104.94(18)

M(1)-Li(2)-N(2)’“ 152.8(2)

M(1)-Li(2)-N(1)’ 103.4(2)

N(2)’“-Li(2)-N(1)’ 102.64(17)

C(2)-N(1)-C(5) 106.32(17)

C(2)-N(1)-Li(1) 95.89(16)

C(5)-N(1)-Li(1) 140.96(18)

C(1)-N(2)-C(13) 114.22(17)

C(1)-N(2)-Li(1)” 131.07(18)

C(13)-N(2)-Li(1)” 114.23(17)

C(1)-N(2)-Li(2)”“ 88.11(16)

C(13)-N(2)-Li(2)”“ 121.99(17)

Li(1)”-N(2)-Li(2)”“ 72.04(16)

C(1)-N(2)-Li(1) 92.07(16)

C(13)-N(2)-Li(1) 104.57(16)

Li(1)”-N(2)-Li(1) 69.62(18)

Li(2)”“-N(2)-Li(1) 128.54(17)

N(2)-C(1)-C(2) 117.57(18)

C(3)-C(2)-N(1) 109.99(19)

C(3)-C(2)-C(1) 130.9(2)

N(1)-C(2)-C(1) 119.12(19)

C(2)-C(3)-C(4) 106.8(2)

C(5)-C(4)-C(3) 106.86(19)

C(4)-C(5)-N(1) 109.99(19)

C(4)-C(5)-C(6) 131.79(19)

N(1)-C(5)-C(6) 117.79(18)

C(5)’-C(6)-C(5) 105.2(2)

C(5)’-C(6)-C(7) 110.62(12)

C(5)-C(6)-C(7) 110.90(11)

C(5)’-C(6)-C(7)’ 110.90(11)

C(5)-C(6)-C(7)’ 110.62(12)

C(7)-C(6)-C(7)’ 108.6(2)

C(12)-C(7)-C(8) 117.4(2)

C(12)-C(7)-C(6) 122.22(19)

C(8)-C(7)-C(6) 120.38(19)

C(9)-C(8)-C(7) 121.4(2)

C(10)-C(9)-C(8) 120.3(3)

C(11)-C(10)-C(9) 119.4(2)

C(10)-C(11)-C(12) 120.4(2)

C(7)-C(12)-C(11) 121.1(2)

N(2)-C(13)-C(15) 105.79(18)

N(2)-C(13)-C(16) 113.59(19)

C(15)-C(13)-C(16) 108.2(2)

N(2)-C(13)-C(14) 112.42(18)

C(15)-C(13)-C(14) 108.2(2)

C(16)-C(13)-C(14) 108.5(2)

____________________________________

Symmetry transformations used to generate equivalent atoms:

“ y+1/3,x-1/3,-z+1/6 ‘ -x+4/3,-x+y+2/3,-z+1/6

‘“ -y+1,x-y,z ““ -x+y+1,-x+1,z

Table 4. Anisotropic displacement parameters (Å2x 103)for feb2401. The anisotropic

displacement factor exponent takes the form: -22[ h2a*2U11 + ... + 2 h k a* b* U12 ]

______________________________________________________________________________

U11 U22 U33 U23 U13 U12

______________________________________________________________________________

Li(1) 33(2) 35(2) 35(2) 0(2) 1(2) 17(2)

Li(2) 33(2) 33(2) 37(2) 0(2) 1(2) 15(2)

N(1) 30(1) 27(1) 31(1) 0(1) -2(1) 15(1)

N(2) 28(1) 31(1) 31(1) -4(1) -4(1) 14(1)

C(1) 33(1) 31(1) 35(1) 1(1) -4(1) 16(1)

C(2) 26(1) 27(1) 33(1) -1(1) -4(1) 11(1)

C(3) 34(1) 36(1) 28(1) -2(1) -1(1) 15(1)

C(4) 31(1) 33(1) 37(1) -6(1) 0(1) 16(1)

C(5) 26(1) 26(1) 36(1) -4(1) -3(1) 13(1)

C(6) 29(2) 27(1) 35(2) -1(1) -3(1) 14(1)

C(7) 33(1) 27(1) 40(1) -2(1) -3(1) 16(1)

C(8) 44(2) 33(1) 64(2) 5(1) -16(1) 13(1)

C(9) 62(2) 35(2) 69(2) 13(1) -16(2) 10(1)

C(10) 50(2) 34(1) 65(2) 6(1) 1(1) 5(1)

C(11) 34(1) 38(1) 58(2) -8(1) -5(1) 12(1)

C(12) 34(1) 31(1) 41(1) -5(1) -4(1) 16(1)

C(13) 33(1) 34(1) 33(1) -5(1) -6(1) 17(1)

C(14) 43(2) 35(1) 47(2) -8(1) -11(1) 17(1)

C(15) 34(1) 53(2) 62(2) -18(1) -9(1) 18(1)

C(16) 61(2) 43(2) 40(2) -8(1) -17(1) 26(1)

______________________________________________________________________________

Table 5. Hydrogen coordinates ( x 104) and isotropic displacement parameters (Å2x 103)

for feb2401.

________________________________________________________________________________

x y z U(eq)

________________________________________________________________________________

H(1B) 7650 4330 1615 39

H(1A) 7380 4059 1230 39

H(3) 6843 4827 1864 40

H(4) 6360 5542 1595 40

H(8) 6788 6776 365 59

H(9) 7713 7837 205 74

H(10) 8779 8258 478 67

H(11) 8901 7627 926 55

H(12) 7976 6558 1087 43

H(14C) 8895 6202 1266 64

H(14B) 9228 6359 1649 64

H(14A) 8407 5926 1603 64

H(15C) 9642 5690 1114 77

H(15B) 9624 5099 1356 77

H(15A) 9946 5870 1502 77

H(16C) 8349 4954 1957 72

H(16B) 9164 5423 2012 72

H(16A) 8847 4656 1863 72

________________________________________________________________________________

Solid state structure of **1b**.


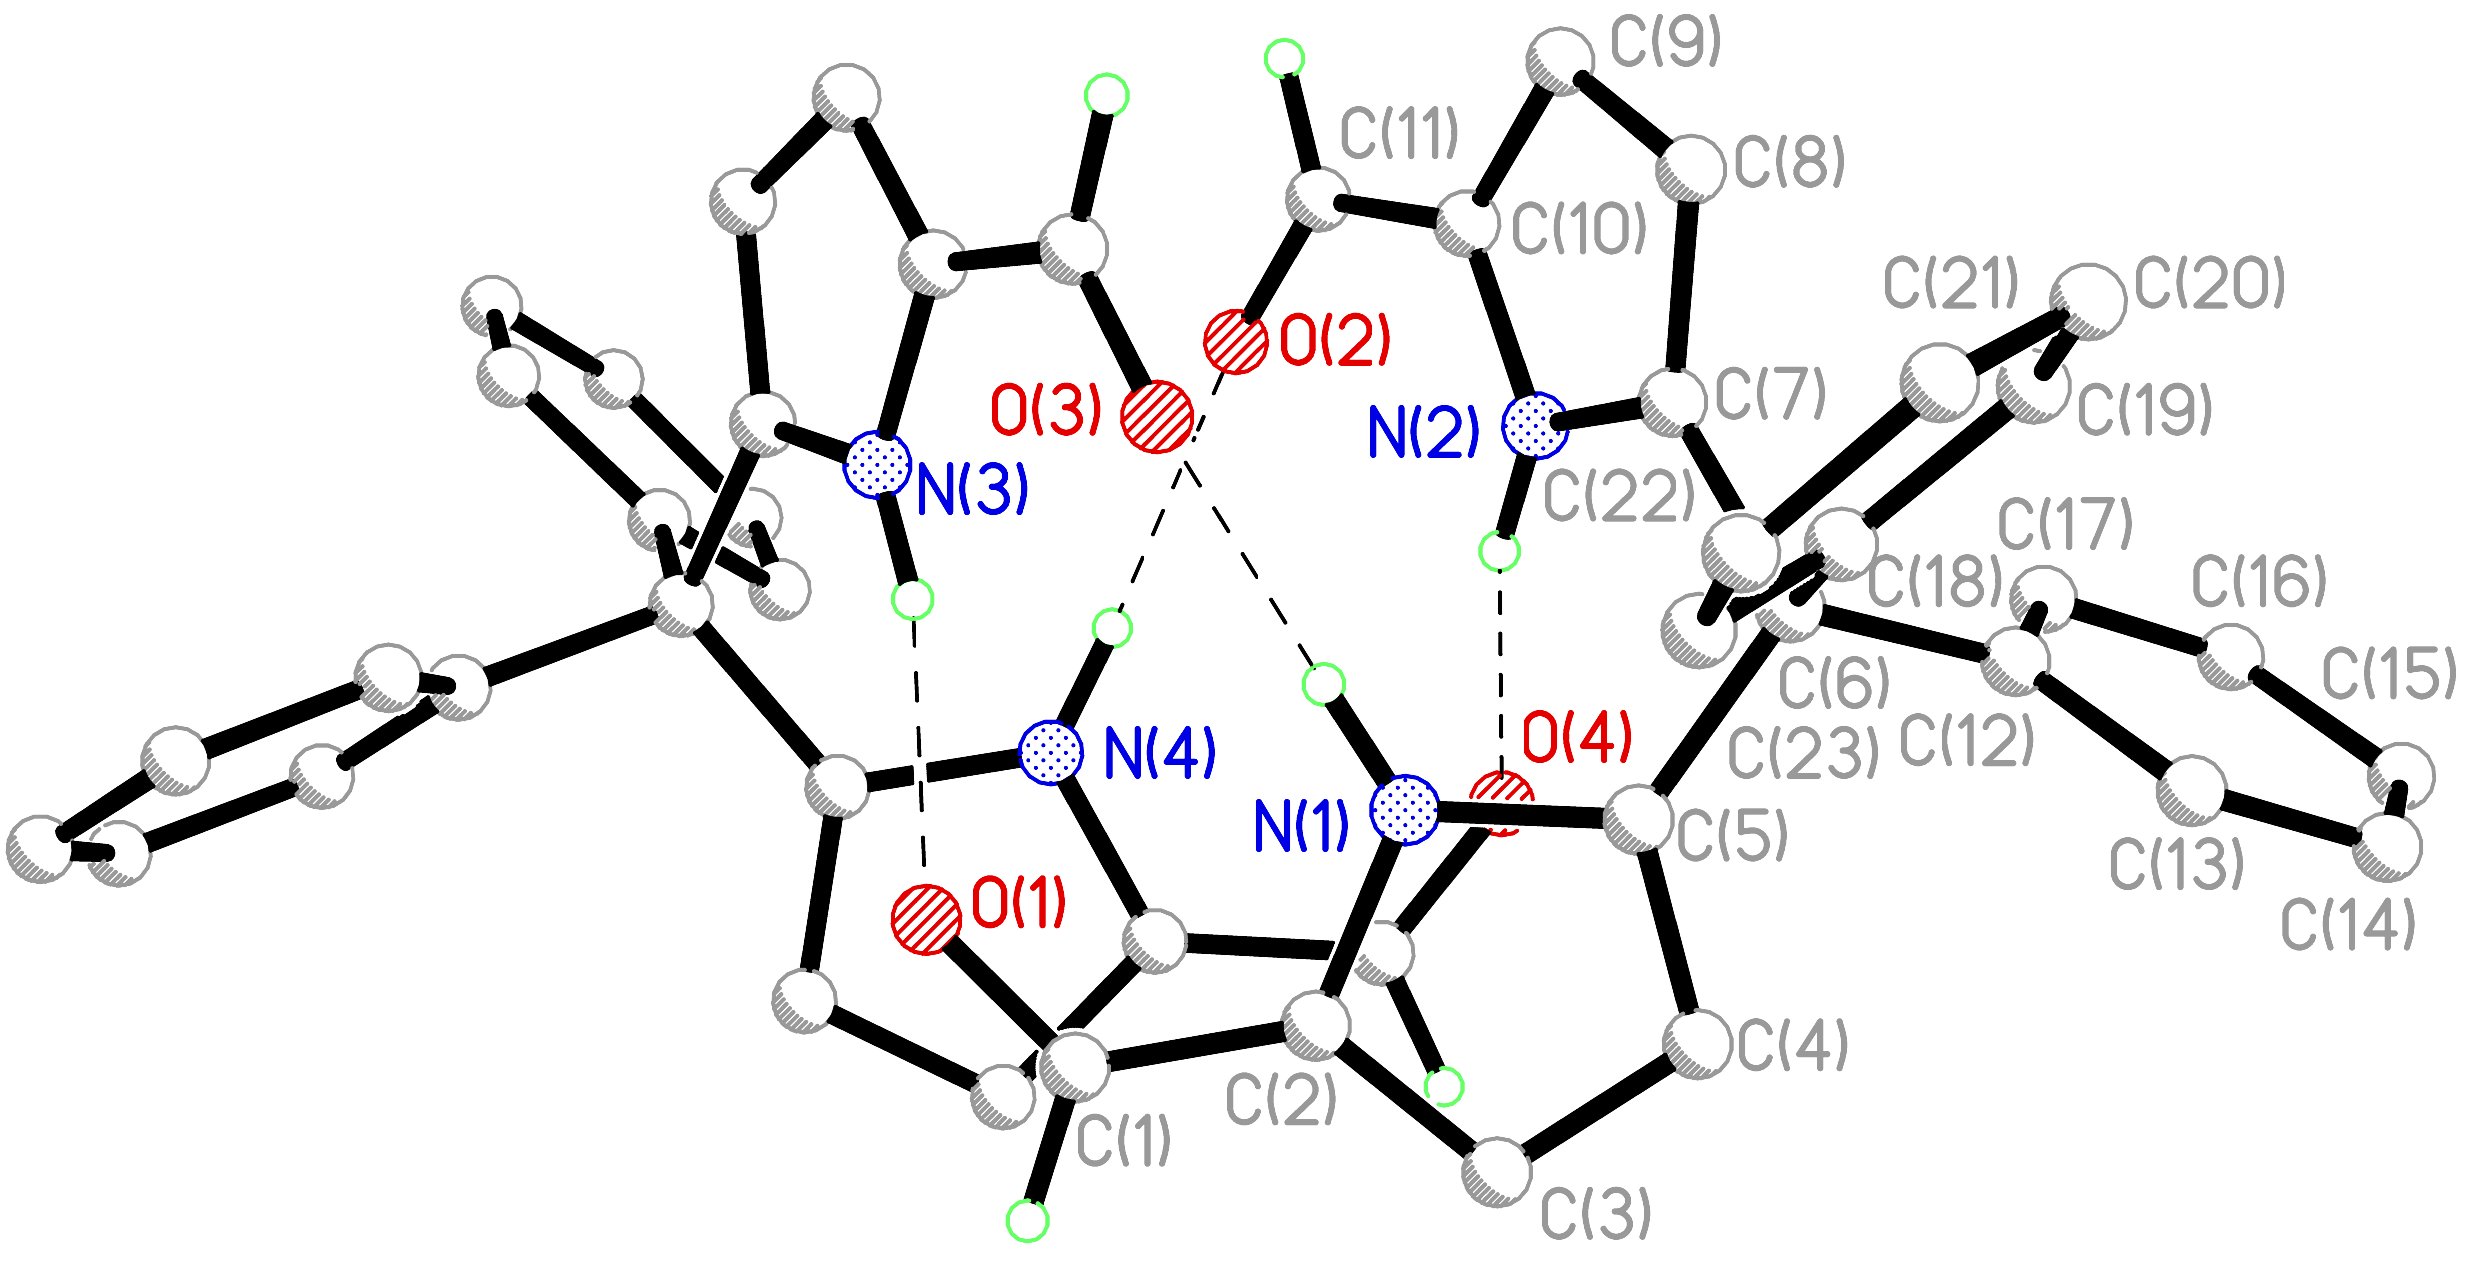


Table 6. Crystal data and structure refinement for DPYRPH.

Identification code dpyrph

Empirical formula C23 H18 N2 O2

Formula weight 354.39

Temperature 150(2) K

Wavelength 0.71073 Å

Crystal system Orthorhombic

Space group Pbca

Unit cell dimensions a = 28.294(2) Å = 90°.

b = 9.1628(8) Å = 90°.

c = 29.053(2) Å  = 90°.

Volume 7532.1(10) Å3

Z 16

Density (calculated) 1.250 Mg/m3

Absorption coefficient 0.081 mm-1

F(000) 2976

Crystal size 0.60 x 0.60 x 0.50 mm3

Theta range for data collection 2.01 to 29.18°.

Index ranges -38<=h<=37, -11<=k<=12, -39<=l<=39

Reflections collected 94471

Independent reflections 9821 [R(int) = 0.060]

Completeness to theta = 27.50° 99.9 %

Absorption correction None

Max. and min. transmission 0.9608 and 0.9532

Refinement method Full-matrix least-squares on F2

Data / restraints / parameters 9821 / 0 / 487

Goodness-of-fit on F2 0.992

Final R indices [I>2sigma(I)] R1 = 0.0426, wR2 = 0.1068

R indices (all data) R1 = 0.0624, wR2 = 0.1131

Largest diff. peak and hole 0.40 and -0.22 e.Å-3

Table 7. Atomic coordinates ( x 104) and equivalent isotropic displacement parameters (Å2x 103)

for DPYRPH. U(eq) is defined as one third of the trace of the orthogonalized Uij tensor.

________________________________________________________________________________

x y z U(eq)

________________________________________________________________________________

O(1) 5297(1) 2233(1) 1954(1) 30(1)

O(2) 7146(1) 1027(1) 1959(1) 40(1)

O(3) 6018(1) 4866(1) 2442(1) 37(1)

O(4) 6392(1) -831(1) 2671(1) 39(1)

N(1) 5726(1) 2166(1) 2854(1) 24(1)

N(2) 6762(1) 2035(1) 2831(1) 26(1)

N(3) 6205(1) 3204(1) 1621(1) 26(1)

N(4) 6194(1) 48(1) 1744(1) 26(1)

C(1) 5145(1) 1451(1) 2264(1) 28(1)

C(2) 5346(1) 1337(1) 2715(1) 25(1)

C(3) 5239(1) 386(1) 3069(1) 30(1)

C(4) 5561(1) 645(1) 3423(1) 29(1)

C(5) 5859(1) 1758(1) 3285(1) 24(1)

C(6) 6264(1) 2498(1) 3538(1) 24(1)

C(7) 6664(1) 2864(1) 3206(1) 26(1)

C(8) 6995(1) 3979(1) 3223(1) 36(1)

C(9) 7300(1) 3802(2) 2848(1) 38(1)

C(10) 7150(1) 2592(1) 2604(1) 31(1)

C(11) 7320(1) 2038(2) 2176(1) 36(1)

C(12) 6433(1) 1422(1) 3913(1) 26(1)

C(13) 6187(1) 1321(1) 4328(1) 33(1)

C(14) 6320(1) 329(1) 4664(1) 37(1)

C(15) 6698(1) -591(1) 4589(1) 38(1)

C(16) 6941(1) -520(2) 4178(1) 42(1)

C(17) 6811(1) 484(1) 3843(1) 33(1)

C(18) 6101(1) 3950(1) 3761(1) 25(1)

C(19) 6380(1) 4584(1) 4103(1) 31(1)

C(20) 6264(1) 5920(1) 4291(1) 34(1)

C(21) 5864(1) 6652(1) 4142(1) 35(1)

C(22) 5580(1) 6028(1) 3812(1) 35(1)

C(23) 5697(1) 4677(1) 3624(1) 29(1)

C(24) 6345(1) 5161(1) 2181(1) 32(1)

C(25) 6459(1) 4392(1) 1770(1) 29(1)

C(26) 6829(1) 4594(1) 1465(1) 35(1)

C(27) 6794(1) 3508(1) 1130(1) 33(1)

C(28) 6406(1) 2651(1) 1232(1) 25(1)

C(29) 6191(1) 1346(1) 983(1) 24(1)

C(30) 5982(1) 292(1) 1330(1) 25(1)

C(31) 5599(1) -635(1) 1296(1) 31(1)

C(32) 5580(1) -1461(1) 1702(1) 34(1)

C(33) 5951(1) -1016(1) 1980(1) 30(1)

C(34) 6075(1) -1398(1) 2446(1) 34(1)

C(35) 5794(1) 1855(1) 651(1) 27(1)

C(36) 5535(1) 3121(1) 733(1) 34(1)

C(37) 5178(1) 3539(2) 433(1) 42(1)

C(38) 5076(1) 2720(2) 48(1) 43(1)

C(39) 5330(1) 1466(2) -37(1) 39(1)

C(40) 5684(1) 1033(1) 264(1) 32(1)

C(41) 6583(1) 563(1) 703(1) 24(1)

C(42) 6782(1) 1264(1) 324(1) 27(1)

C(43) 7133(1) 593(1) 69(1) 29(1)

C(44) 7283(1) -801(1) 180(1) 32(1)

C(45) 7081(1) -1515(1) 547(1) 32(1)

C(46) 6735(1) -835(1) 811(1) 29(1)

________________________________________________________________________________

Table 8. Bond lengths [Å] and angles [°] for DPYRPH.

___________________________________________

O(1)-C(1) 1.2269(14)

O(2)-C(11) 1.2241(16)

O(3)-C(24) 1.2245(15)

O(4)-C(34) 1.2250(15)

N(1)-C(5) 1.3604(14)

N(1)-C(2) 1.3762(14)

N(2)-C(7) 1.3576(15)

N(2)-C(10) 1.3785(15)

N(3)-C(28) 1.3633(14)

N(3)-C(25) 1.3744(15)

N(4)-C(30) 1.3624(14)

N(4)-C(33) 1.3752(15)

C(1)-C(2) 1.4325(16)

C(2)-C(3) 1.3816(17)

C(3)-C(4) 1.3955(17)

C(4)-C(5) 1.3825(16)

C(5)-C(6) 1.5218(15)

C(6)-C(7) 1.5237(16)

C(6)-C(12) 1.5464(16)

C(6)-C(18) 1.5502(15)

C(7)-C(8) 1.3874(16)

C(8)-C(9) 1.3977(18)

C(9)-C(10) 1.3831(18)

C(10)-C(11) 1.4258(18)

C(12)-C(17) 1.3863(16)

C(12)-C(13) 1.3939(16)

C(13)-C(14) 1.3855(18)

C(14)-C(15) 1.3799(19)

C(15)-C(16) 1.381(2)

C(16)-C(17) 1.3881(18)

C(18)-C(23) 1.3813(16)

C(18)-C(19) 1.3954(16)

C(19)-C(20) 1.3802(17)

C(20)-C(21) 1.3858(17)

C(21)-C(22) 1.3771(18)

C(22)-C(23) 1.3931(17)

C(24)-C(25) 1.4250(17)

C(25)-C(26) 1.3819(17)

C(26)-C(27) 1.3950(17)

C(27)-C(28) 1.3834(16)

C(28)-C(29) 1.5240(16)

C(29)-C(30) 1.5168(15)

C(29)-C(41) 1.5504(15)

C(29)-C(35) 1.5520(16)

C(30)-C(31) 1.3793(16)

C(31)-C(32) 1.4038(17)

C(32)-C(33) 1.3845(18)

C(33)-C(34) 1.4421(18)

C(35)-C(40) 1.3889(17)

C(35)-C(36) 1.3918(17)

C(36)-C(37) 1.3887(18)

C(37)-C(38) 1.379(2)

C(38)-C(39) 1.378(2)

C(39)-C(40) 1.3883(18)

C(41)-C(46) 1.3858(16)

C(41)-C(42) 1.3948(16)

C(42)-C(43) 1.3845(16)

C(43)-C(44) 1.3847(18)

C(44)-C(45) 1.3759(17)

C(45)-C(46) 1.3917(17)

C(5)-N(1)-C(2) 109.53(9)

C(7)-N(2)-C(10) 109.86(10)

C(28)-N(3)-C(25) 109.68(10)

C(30)-N(4)-C(33) 109.68(10)

O(1)-C(1)-C(2) 124.99(11)

N(1)-C(2)-C(3) 107.48(10)

N(1)-C(2)-C(1) 122.56(10)

C(3)-C(2)-C(1) 129.81(11)

C(2)-C(3)-C(4) 107.45(10)

C(5)-C(4)-C(3) 107.93(11)

N(1)-C(5)-C(4) 107.61(10)

N(1)-C(5)-C(6) 122.08(10)

C(4)-C(5)-C(6) 130.30(11)

C(5)-C(6)-C(7) 110.59(9)

C(5)-C(6)-C(12) 106.86(9)

C(7)-C(6)-C(12) 110.89(9)

C(5)-C(6)-C(18) 111.09(9)

C(7)-C(6)-C(18) 107.23(9)

C(12)-C(6)-C(18) 110.22(9)

N(2)-C(7)-C(8) 107.51(10)

N(2)-C(7)-C(6) 122.49(10)

C(8)-C(7)-C(6) 129.95(11)

C(7)-C(8)-C(9) 107.80(11)

C(10)-C(9)-C(8) 107.57(11)

N(2)-C(10)-C(9) 107.25(11)

N(2)-C(10)-C(11) 123.50(12)

C(9)-C(10)-C(11) 129.03(12)

O(2)-C(11)-C(10) 125.85(12)

C(17)-C(12)-C(13) 118.11(11)

C(17)-C(12)-C(6) 122.03(10)

C(13)-C(12)-C(6) 119.77(10)

C(14)-C(13)-C(12) 121.12(12)

C(15)-C(14)-C(13) 120.03(13)

C(14)-C(15)-C(16) 119.55(12)

C(15)-C(16)-C(17) 120.38(13)

C(12)-C(17)-C(16) 120.80(12)

C(23)-C(18)-C(19) 118.19(10)

C(23)-C(18)-C(6) 122.72(10)

C(19)-C(18)-C(6) 119.05(10)

C(20)-C(19)-C(18) 121.19(11)

C(19)-C(20)-C(21) 119.93(11)

C(22)-C(21)-C(20) 119.60(12)

C(21)-C(22)-C(23) 120.24(11)

C(18)-C(23)-C(22) 120.82(11)

O(3)-C(24)-C(25) 125.57(12)

N(3)-C(25)-C(26) 107.51(10)

N(3)-C(25)-C(24) 122.42(11)

C(26)-C(25)-C(24) 130.01(11)

C(25)-C(26)-C(27) 107.39(11)

C(28)-C(27)-C(26) 108.12(11)

N(3)-C(28)-C(27) 107.30(10)

N(3)-C(28)-C(29) 121.30(10)

C(27)-C(28)-C(29) 131.36(10)

C(30)-C(29)-C(28) 109.81(9)

C(30)-C(29)-C(41) 109.44(9)

C(28)-C(29)-C(41) 109.09(9)

C(30)-C(29)-C(35) 108.77(9)

C(28)-C(29)-C(35) 110.36(9)

C(41)-C(29)-C(35) 109.34(9)

N(4)-C(30)-C(31) 107.93(10)

N(4)-C(30)-C(29) 121.31(10)

C(31)-C(30)-C(29) 130.58(11)

C(30)-C(31)-C(32) 107.52(11)

C(33)-C(32)-C(31) 107.62(11)

N(4)-C(33)-C(32) 107.24(11)

N(4)-C(33)-C(34) 121.25(11)

C(32)-C(33)-C(34) 131.29(11)

O(4)-C(34)-C(33) 125.17(12)

C(40)-C(35)-C(36) 118.23(11)

C(40)-C(35)-C(29) 120.13(10)

C(36)-C(35)-C(29) 121.64(11)

C(37)-C(36)-C(35) 120.34(13)

C(38)-C(37)-C(36) 120.80(13)

C(39)-C(38)-C(37) 119.39(13)

C(38)-C(39)-C(40) 120.08(13)

C(39)-C(40)-C(35) 121.16(12)

C(46)-C(41)-C(42) 118.59(11)

C(46)-C(41)-C(29) 122.08(10)

C(42)-C(41)-C(29) 119.31(10)

C(43)-C(42)-C(41) 120.59(11)

C(42)-C(43)-C(44) 120.28(11)

C(45)-C(44)-C(43) 119.54(11)

C(44)-C(45)-C(46) 120.40(12)

C(41)-C(46)-C(45) 120.57(11)

___________________________________________

Symmetry transformations used to generate equivalent atoms:

Table 9. Anisotropic displacement parameters (Å2x 103) for DPYRPH. The anisotropic

displacement factor exponent takes the form: -22[ h2 a*2U11 + ... + 2 h k a* b* U12 ]

______________________________________________________________________________

U11 U22 U33 U23 U13 U12

______________________________________________________________________________

O(1) 29(1) 31(1) 31(1) -3(1) -1(1) 3(1)

O(2) 32(1) 52(1) 36(1) -5(1) 3(1) 4(1)

O(3) 48(1) 29(1) 34(1) -3(1) 9(1) -2(1)

O(4) 46(1) 33(1) 38(1) 0(1) -2(1) 2(1)

N(1) 24(1) 24(1) 24(1) -2(1) 0(1) -1(1)

N(2) 23(1) 28(1) 27(1) 0(1) -1(1) 0(1)

N(3) 27(1) 23(1) 28(1) -1(1) 4(1) -1(1)

N(4) 27(1) 25(1) 27(1) 0(1) 3(1) 0(1)

C(1) 22(1) 28(1) 33(1) -8(1) 0(1) 1(1)

C(2) 22(1) 25(1) 29(1) -8(1) 2(1) 0(1)

C(3) 28(1) 27(1) 35(1) -6(1) 5(1) -4(1)

C(4) 34(1) 26(1) 28(1) 0(1) 4(1) -1(1)

C(5) 25(1) 23(1) 24(1) -3(1) 1(1) 2(1)

C(6) 25(1) 23(1) 24(1) -2(1) -2(1) 1(1)

C(7) 26(1) 27(1) 26(1) 1(1) -3(1) 1(1)

C(8) 37(1) 35(1) 36(1) -3(1) 1(1) -9(1)

C(9) 32(1) 43(1) 40(1) 3(1) 2(1) -9(1)

C(10) 25(1) 37(1) 31(1) 5(1) 2(1) 1(1)

C(11) 26(1) 47(1) 34(1) 5(1) 3(1) 4(1)

C(12) 30(1) 24(1) 26(1) -2(1) -5(1) -1(1)

C(13) 40(1) 29(1) 30(1) 0(1) 2(1) 3(1)

C(14) 51(1) 34(1) 28(1) 1(1) -2(1) -7(1)

C(15) 46(1) 31(1) 35(1) 6(1) -16(1) -5(1)

C(16) 39(1) 40(1) 45(1) 4(1) -11(1) 10(1)

C(17) 33(1) 37(1) 30(1) 1(1) -4(1) 5(1)

C(18) 28(1) 23(1) 24(1) 0(1) 0(1) 0(1)

C(19) 32(1) 29(1) 31(1) -2(1) -8(1) 4(1)

C(20) 40(1) 30(1) 33(1) -6(1) -8(1) -1(1)

C(21) 42(1) 26(1) 39(1) -6(1) -2(1) 4(1)

C(22) 34(1) 32(1) 38(1) -4(1) -6(1) 8(1)

C(23) 28(1) 31(1) 27(1) -3(1) -5(1) 1(1)

C(24) 37(1) 23(1) 35(1) -1(1) -1(1) -1(1)

C(25) 31(1) 24(1) 31(1) -1(1) -2(1) 0(1)

C(26) 35(1) 31(1) 38(1) -3(1) 3(1) -9(1)

C(27) 30(1) 34(1) 33(1) -4(1) 6(1) -6(1)

C(28) 25(1) 25(1) 26(1) 0(1) 2(1) 1(1)

C(29) 23(1) 25(1) 25(1) -1(1) 2(1) -1(1)

C(30) 25(1) 24(1) 26(1) -2(1) 4(1) 2(1)

C(31) 29(1) 30(1) 34(1) -3(1) 2(1) -3(1)

C(32) 36(1) 26(1) 38(1) -1(1) 10(1) -4(1)

C(33) 35(1) 23(1) 32(1) 1(1) 10(1) 2(1)

C(34) 42(1) 23(1) 35(1) 1(1) 8(1) 3(1)

C(35) 23(1) 29(1) 28(1) 5(1) 2(1) -3(1)

C(36) 33(1) 33(1) 37(1) 6(1) 2(1) 3(1)

C(37) 35(1) 40(1) 53(1) 16(1) 0(1) 6(1)

C(38) 33(1) 52(1) 43(1) 20(1) -8(1) -5(1)

C(39) 34(1) 49(1) 35(1) 9(1) -6(1) -13(1)

C(40) 28(1) 35(1) 33(1) 2(1) -1(1) -5(1)

C(41) 21(1) 28(1) 24(1) -4(1) -1(1) 0(1)

C(42) 25(1) 29(1) 27(1) -2(1) -1(1) -1(1)

C(43) 25(1) 37(1) 25(1) -4(1) 1(1) -5(1)

C(44) 24(1) 38(1) 32(1) -10(1) 1(1) 1(1)

C(45) 30(1) 29(1) 36(1) -4(1) -2(1) 4(1)

C(46) 29(1) 29(1) 28(1) -1(1) 0(1) 0(1)

______________________________________________________________________________

Table 10. Hydrogen coordinates ( x 104) and isotropic displacement parameters (Å2x 10 3)

for DPYRPH.

________________________________________________________________________________

x y z U(eq)

________________________________________________________________________________

H(1A) 5862 2854 2689 29

H(2A) 6602 1259 2745 31

H(3A) 5951 2854 1757 31

H(4A) 6447 503 1845 32

H(1B) 4873 876 2199 33

H(3B) 4992 -315 3070 36

H(4B) 5574 144 3709 35

H(8A) 7012 4729 3448 43

H(9A) 7563 4404 2775 46

H(11A) 7591 2495 2049 43

H(13A) 5924 1944 4381 40

H(14A) 6150 282 4945 45

H(15A) 6791 -1269 4820 45

H(16A) 7199 -1161 4124 50

H(17A) 6983 528 3562 40

H(19A) 6654 4086 4208 37

H(20A) 6459 6337 4522 41

H(21A) 5786 7579 4268 42

H(22A) 5303 6521 3712 42

H(23A) 5496 4251 3398 34

H(24A) 6538 5971 2260 38

H(26A) 7063 5336 1481 41

H(27A) 7002 3379 876 39

H(31A) 5387 -702 1043 37

H(32A) 5354 -2193 1774 40

H(34A) 5897 -2149 2590 40

H(36A) 5603 3701 996 41

H(37A) 5001 4399 495 51

H(38A) 4833 3017 -157 52

H(39A) 5263 897 -303 47

H(40A) 5854 158 205 38

H(42A) 6675 2209 239 32

H(43A) 7272 1092 -184 35

H(44A) 7524 -1262 4 38

H(45A) 7179 -2479 621 38

H(46A) 6601 -1332 1066 35

________________________________________________________________________________
